# Supplementary material for: Gold and palladium supported on an ionic liquid modified Fe-based metal–organic framework (MOF) as highly efficient catalysts for the reduction of nitrophenols, dyes and Sonogashira–Hagihara reactions
Source: Royal Society of Chemistry journal article supplement (doi:10.1039/d3ra00283g), 2023-01-01
Supplement: d3ra00283g1.pdf [file d3ra00283g1.pdf]

## Supporting information

# Gold and Palladium Supported on Ionic Liquid Modified Fe-based Metal–Organic Framework (MOF) as Highly Efficient Catalysts for Reduction of Reduction of Nitrophenols, Dyes and Sonogashira-Hagihara Reactions

Shirin Karimi,<sup>a</sup> Mohammad Gholinejad,<sup>a,b\*</sup> Rahimeh Khezri,<sup>c</sup> José M. Sansano,<sup>d,e</sup> Carmen Nájera,<sup>e</sup> and Miguel Yus.<sup>e</sup>

<sup>a</sup> *Department of Chemistry, Institute for Advanced Studies in Basic Sciences (IASBS), P. O. Box 45195-1159, Gavazang, Zanjan 45137-66731, Iran.*

<sup>b</sup> *Research Center for Basic Sciences & Modern Technologies (RBST). Institute for Advanced Studies in Basic Sciences (IASBS), Zanjan 45137-66731, Iran.*

<sup>c</sup> *Department of Chemistry, Faculty of Sciences, Persian Gulf University, Bushehr, 75169, Iran.*

<sup>d</sup> *Departamento de Química Orgánica and Instituto de Síntesis Orgánica, Universidad de Alicante, Apdo. 99, 03690-Alicante, Spain.*

<sup>e</sup> *Centro de Innovación en Química Avanzada (ORFEO-CINQA), Universidad de Alicante, Apdo. 99, 03690-Alicante, Spain.*

## Table of Contents

|                                                                                   |            |
|-----------------------------------------------------------------------------------|------------|
| <b>1. Optimization tables and kinetic results.....</b>                            | <b>S4</b>  |
| <b>2. Compound's characterization .....</b>                                       | <b>S6</b>  |
| <b>3. Copy of Original <sup>1</sup>H NMR and <sup>13</sup>C NMR spectra .....</b> | <b>S10</b> |
| <b>4. References .....</b>                                                        | <b>S29</b> |

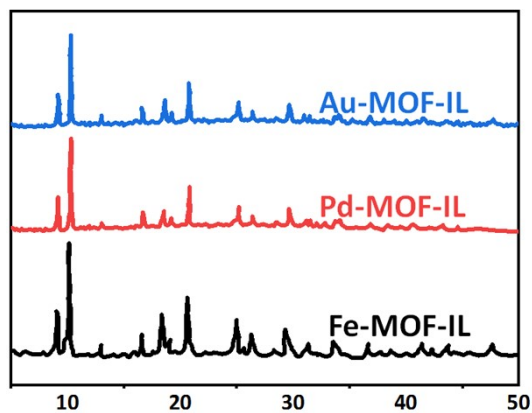

Figure S 1. XRD pattern dates of Fe-MOF-IL, Au@Fe-MOF-IL and Pd@Fe-MOF-IL.

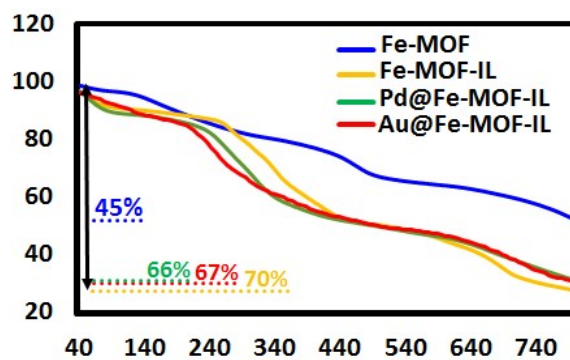

Figure S 2. TGA analysis of Fe-MOF, Fe-MOF-IL, Au@Fe-MOF-IL, and Pd@Fe-MOF-IL.

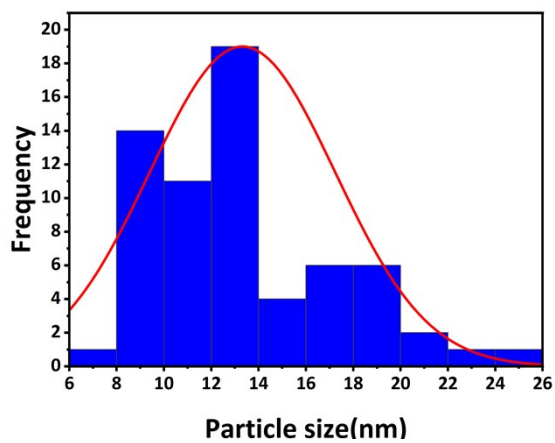

Figure S 3. Statistical analysis of the size distribution of Au NPs in Au@ Fe-MOF-IL catalyst.

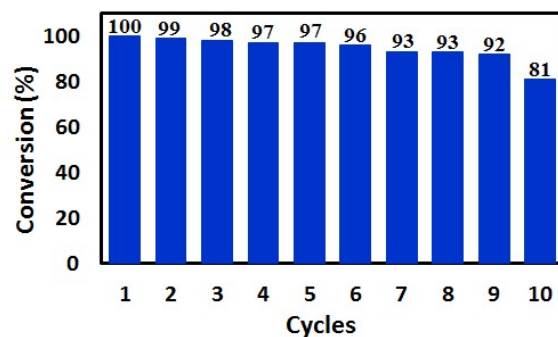

Figure S 4. Recycling of Au@Fe-MOF-IL in *p*-nitrophenol reduction.

## 1. Optimization tables and kinetic results

**Table S 1.** Optimization of 4-NP reduction reactions by different reducing agents in the presence of Au@Fe-MOF-IL catalyst<sup>a</sup>.

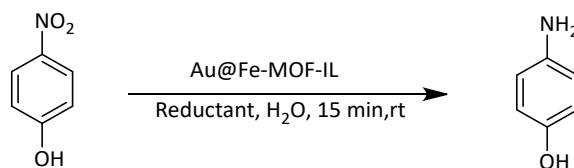

| Entry | Reductant         | Yield (%) |
|-------|-------------------|-----------|
| 1     | Glycerol          | 7         |
| 2     | Hydrazine         | 13        |
| 3     | Formic acid       | 5         |
| 4     | NaBH <sub>4</sub> | 99        |

<sup>a</sup>Reaction condition: 4-Nitro phenol (0.2 mmol), NaBH<sub>4</sub> (1 mmol), catalyst (6 mg Au@Fe-MOF-IL containing 0.033 mol% Au) in H<sub>2</sub>O (1.5 mL) at room temperature.

**Table S 2.** Kinetic information of nitrophenol isomers reduction reactions calculated of UV-Vis spectrum (e.g. Conversion, reaction time,  $K_{app}$  and  $K_{nor}$ ).

| Entry | Sample                | Conversion (%) | $K_{app}$ ( $s^{-1}$ ) | $K_{nor}$ ( $g^{-1}s^{-1}$ ) | t (s) |
|-------|-----------------------|----------------|------------------------|------------------------------|-------|
| 1     | <i>p</i> -nitrophenol | 100            | $5.4 \times 10^{-3}$   | 5.4                          | 120   |
| 2     | <i>m</i> -nitrophenol | 96             | $3.3 \times 10^{-3}$   | 3.3                          | 30    |
| 3     | <i>o</i> -nitrophenol | 97             | $1.6 \times 10^{-3}$   | 1.6                          | 120   |

**Table S 3.** Kinetic information of organic dyes (MB, MO, and MR) reduction reactions calculated of UV-Vis spectrum (e.g. Conversion, reaction time,  $K_{app}$  and  $K_{nor}$ ).

| Entry | Sample         | Conversion (%) | $K_{app}$ ( $s^{-1}$ ) | $K_{nor}$ ( $g^{-1}s^{-1}$ ) | t (s) |
|-------|----------------|----------------|------------------------|------------------------------|-------|
| 1     | Methylene blue | 92             | $1.46 \times 10^{-2}$  | 14.6                         | 30    |
| 2     | Methyl orange  | 90             | $5.6 \times 10^{-3}$   | 5.6                          | 45    |
| 3     | Methyl red     | 100            | $7 \times 10^{-3}$     | 7                            | 300   |

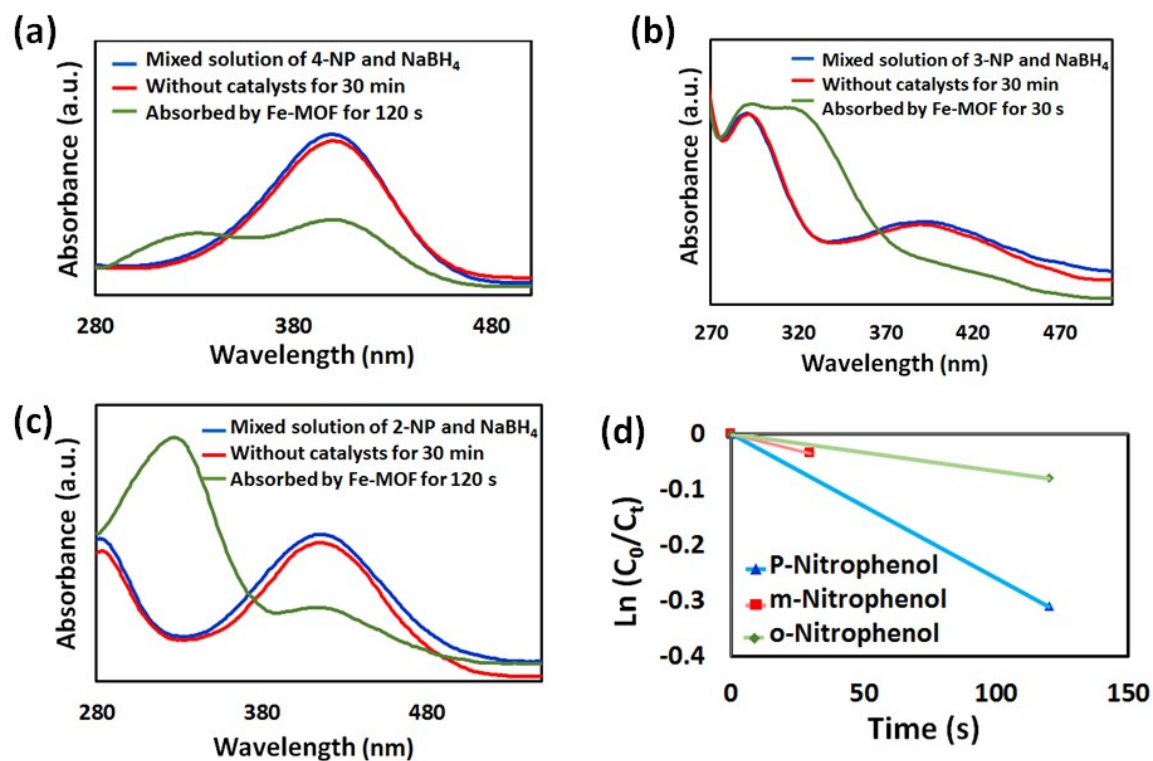

**Figure S 5.** UV-Vis spectra of original nitrophenol isomer solutions, and their spectra after adsorption by NaBH<sub>4</sub> for 30 min and after adsorption by 1.0 mg of Fe-MOF-IL for 120 s.

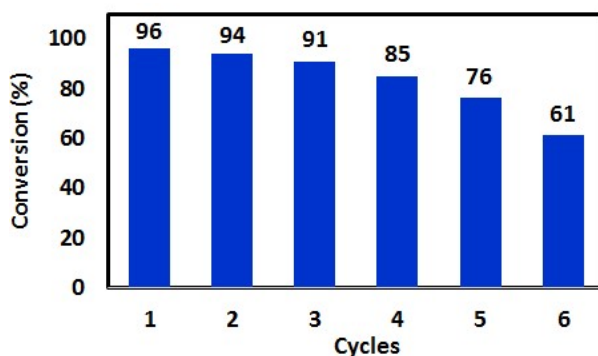

**Figure S 6.** Recycling of Pd@Fe-MOF-IL in Sonogashira-Hagihara cross-coupling reaction.

**Table S 4.** Non-exhaustive survey of catalytic performance of some Au-based catalysts reported for 4-NP reduction reaction with NaBH<sub>4</sub>.

| Catalyst                               | K <sub>app</sub> ( × 10 <sup>-3</sup> s <sup>-1</sup> ) | Time (s) | Ref.                                           |
|----------------------------------------|---------------------------------------------------------|----------|------------------------------------------------|
| Au@Fe-MOF-IL                           | 5.4                                                     | 120      | This work                                      |
| Fe <sub>3</sub> O <sub>4</sub> @COF-Au | 3.70                                                    | 960      | J. Mater. Chem. A, 2019 [99]                   |
| YC7@AuNPBump                           | 3.50                                                    | 660      | Biomacromolecules, Lee2018 [100]               |
| YC7@AuNPPhed                           | 4.20                                                    | 420      | Biomacromolecules, Lee2018 [100]               |
| p(AAm-co-TMT)@Au                       | 2.30                                                    | 660      | Applied Catalysis B: Environmental, 2019 [101] |
| Au/OMS composite                       | 0.97                                                    | 3600     | J. Am. Chem. Soc., 2011 [102]                  |
| Au-PDA/RGO                             | 2.00                                                    | 960      | Applied Catalysis B: Environmental, 2016 [103] |
| Au10-JP                                | 1.17                                                    | 1080     | ChemistrySelect, 2019 [104]                    |

## 2. Compounds characterization

### 1-(2-bromoethyl)-3-methylimidazolium bromide ionic liquid (IL):

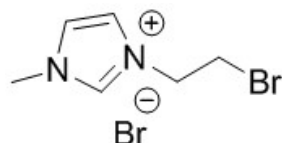

<sup>1</sup>H NMR (400 MHz, DMSO-*d*<sub>6</sub>) δ(ppm): 9.42 (s, 1H), 7.96 (s, 1H), 7.85 (s, 1H), 4.68 (t, *J* = 5.8 Hz, 2H), 4.00 (t, *J* = 5.8 Hz, 2H), 3.93 (s, 3H). <sup>13</sup>C NMR (100 MHz, DMSO-*d*<sub>6</sub>) δ(ppm): 137.60, 137.44, 124.24, 124.13, 122.89, 122.83, 50.53, 36.56, 36.30, 32.16.

### 1,2-Diphenylethyne [1]:

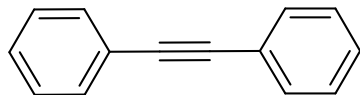

$^1\text{H}$  NMR (400 MHz, Chloroform-*d*)  $\delta$ (ppm): 7.63-7.58 (m, 4H), 7.45-7.37 (m, 6H).  $^{13}\text{C}$  NMR (100 MHz, Chloroform-*d*)  $\delta$ (ppm): 131.75, 131.61, 128.34, 123.31, 89.45.

### 4-(Phenylethynyl)benzaldehyde [2]:

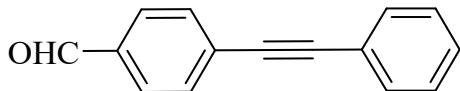

$^1\text{H}$  NMR (400 MHz, Chloroform-*d*)  $\delta$ (ppm): 10.06 (s, 1H), 7.90 (d,  $J$ = 8.3 Hz, 2H), 7.71 (d,  $J$ = 8.3 Hz, 2H), 7.62-7.57 (m, 2H), 7.43-7.40 (m, 3H).  $^{13}\text{C}$  NMR (100 MHz, Chloroform-*d*)  $\delta$ (ppm): 191.49, 135.43, 132.19, 132.09, 131.90, 131.76, 129.65, 128.45, 122.52, 93.49, 88.55.

### 4-(Phenylethynyl)benzotrile [3]:

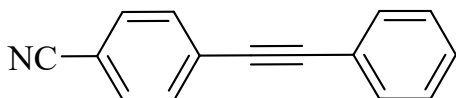

$^1\text{H}$  NMR (400 MHz, Chloroform-*d*)  $\delta$ (ppm): 7.68-7.62 (m, 4H), 7.61-7.56 (m, 2H), 7.45-7.40 (m, 3H).  $^{13}\text{C}$  NMR (100 MHz, Chloroform-*d*)  $\delta$ (ppm): 132.19, 132.11, 132.04, 131.92, 131.77, 128.27, 122.24, 118.62, 111.48, 93.83, 87.78.

### 1-Methyl-4-(phenylethynyl)benzene [1]:

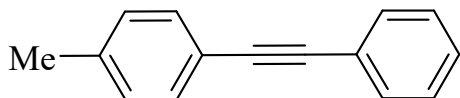

$^1\text{H}$  NMR (400 MHz, Chloroform-*d*)  $\delta$ (ppm): 7.61-7.57 (m, 2H), 7.49 (d,  $J$ = 8.1 Hz, 2H), 7.42-7.37 (m, 3H), 7.21 (d,  $J$ = 7.8 Hz, 2H), 2.42 (s, 3H).  $^{13}\text{C}$  NMR (100 MHz, Chloroform-*d*)  $\delta$ (ppm): 138.43, 131.64, 131.48, 129.25, 129.08, 128.27, 123.52, 120.23, 89.61, 88.77, 21.48.

### 1-Methoxy-4-(phenylethynyl)benzene [4]:

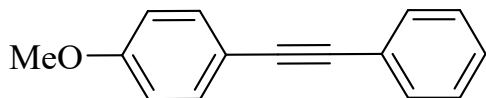

$^1\text{H}$  NMR (400 MHz, Chloroform-*d*)  $\delta$ (ppm): 7.57-7.55 (m, 2H), 7.52 (d,  $J$ = 8.9 Hz, 2H), 7.40-7.35 (m, 3H), 6.92 (d,  $J$ = 8.9 Hz, 2H), 3.87 (s, 3H).  $^{13}\text{C}$  NMR (100 MHz, Chloroform-*d*) (ppm):  $\delta$  159.65, 133.16, 133.02, 131.41, 123.62, 115.41, 114.12, 113.94, 89.40, 88.10, 55.22.

### 2-(P-tolylethynyl)thiophene [5]:

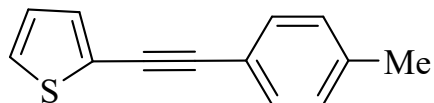

$^1\text{H}$  NMR (400 MHz, Chloroform-*d*)  $\delta$ (ppm): 7.46 (d,  $J$  = 8.1 Hz, 2H), 7.34 – 7.29 (m, 2H), 7.20 (d,  $J$  = 7.9 Hz, 2H), 7.07 – 7.03 (m, 1H), 2.41 (s, 3H).  $^{13}\text{C}$  NMR (101 MHz, Chloroform-*d*)  $\delta$ (ppm): 138.66, 131.70, 131.36, 129.20, 127.08, 127.02, 123.60, 119.87, 93.27, 81.98, 21.58.

**4-Methyl-1-nitro-2-(phenylethynyl)benzene [6]:**

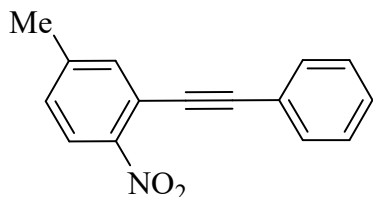

$^1\text{H}$  NMR (400 MHz, Chloroform-*d*)  $\delta$ (ppm): 8.13 (s, 1H), 8.06 (d,  $J$  = 10.8 Hz, 1H), 7.64 (d,  $J$  = 8.5 Hz, 1H), 7.61-7.58 (m, 2H), 7.45-7.40 (m, 3H), 2.63 (s, 3H).  $^{13}\text{C}$  NMR (101 MHz, Chloroform-*d*)  $\delta$ (ppm): 146.87, 141.74, 132.36, 131.87, 131.72, 130.07, 128.52, 124.31, 122.38, 120.90, 98.57, 86.70, 20.82.

**2-(Phenylethynyl)pyridine [2]:**

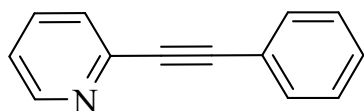

$^1\text{H}$  NMR (400 MHz, Chloroform-*d*)  $\delta$ (ppm): 8.65 (dd,  $J$  = 4.9, 2.8 Hz, 1H), 7.73-7.68 (m, 1H), 7.65-7.62 (m, 2H), 7.56 (dd,  $J$  = 7.9, 1.1 Hz, 1H), 7.41-7.38 (m, 3H), 7.29-7.25 (m, 1H).  $^{13}\text{C}$  NMR (100 MHz, Chloroform-*d*)  $\delta$ (ppm): 150.05, 143.51, 136.24, 132.15, 132.02, 128.34, 127.13, 122.70, 122.29, 89.24, 88.65.

**5-(Phenylethynyl)pyrimidine [7]:**

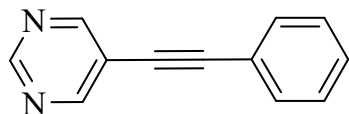

$^1\text{H}$  NMR (400 MHz, Chloroform-*d*)  $\delta$  (ppm): 9.28 (s, 1H), 8.86 (s, 2H), 7.61-7.58 (m, 2H), 7.45-7.41 (m, 3H).  $^{13}\text{C}$  NMR (100 MHz, Chloroform-*d*)  $\delta$ (ppm): 158.67, 156.71, 131.82, 129.42, 128.60, 121.88, 121.77, 96.37, 82.64.

**1-Methyl-2-(phenylethynyl)benzene [2]:**



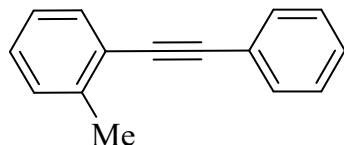

$^1\text{H}$  NMR (400 MHz, Chloroform-*d*)  $\delta$  (ppm): 7.63-7.61 (m, 3H), 7.46-7.39 (m, 3H), 7.32-7.24 (m, 3H), 2.62 (s, 3H).  $^{13}\text{C}$  NMR (100 MHz, Chloroform-*d*)  $\delta$ (ppm): 140.27, 132.60, 131.93, 131.60, 129.57, 129.31, 128.55, 128.41, 125.69, 121.87, 93.45, 88.47, 20.85.

**1-Chloro-4-(phenylethynyl)benzene [1]:**

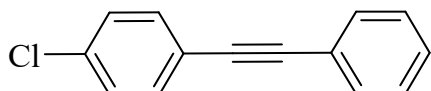

$^1\text{H}$  NMR (400 MHz, Chloroform-*d*)  $\delta$ (ppm): 7.58-7.55 (m, 2H), 7.50 (d,  $J$ = 8.7 Hz, 2H), 7.41-7.38 (m, 3H), 7.36 (d,  $J$ = 8.7 Hz, 2H).  $^{13}\text{C}$  NMR (100 MHz, Chloroform-*d*)  $\delta$  (ppm): 134.29, 132.84, 131.64, 128.73, 128.53, 128.43, 122.96, 121.81, 90.36, 88.27.

**1-Nitro-4-(phenylethynyl)benzene [8]:**

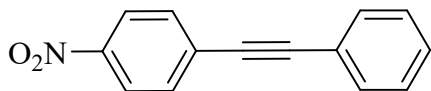

$^1\text{H}$  NMR (400 MHz, Chloroform-*d*)  $\delta$  (ppm): 8.26 (d,  $J$ = 16.1, 2H), 7.72 (d,  $J$ = 12.7 Hz, 2H), 7.61-7.59 (m, 2H), 7.44-7.42 (m, 3H).  $^{13}\text{C}$  NMR (100 MHz, Chloroform-*d*)  $\delta$ (ppm): 147.01, 132.31, 131.88, 130.30, 129.32, 128.58, 123.68, 122.12, 94.74, 87.57.

**1-Nitro-2-(phenylethynyl)benzene [8]:**

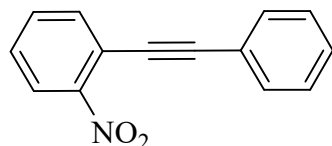

$^1\text{H}$  NMR (400 MHz, Chloroform-*d*)  $\delta$ (ppm): 8.13 (d,  $J$ = 7.8 Hz, 1H), 7.75 (d,  $J$ = 8.6 Hz, 1H), 7.65-7.62 (m, 3H), 7.50 (t,  $J$ = 7.8 Hz, 1H), 7.44-7.40 (m, 3H).  $^{13}\text{C}$  NMR (100 MHz, Chloroform-*d*)  $\delta$ (ppm): 149.55, 134.52, 132.77, 131.98, 129.20, 128.48, 128.42, 124.69, 122.33, 118.73, 97.09, 84.72.

**2-(Phenylethynyl)thiophene [8]:**

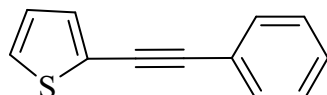

$^1\text{H}$  NMR (400 MHz, Chloroform-*d*)  $\delta$  (ppm): 7.59-7.55 (m, 2H), 7.42-7.38 (m, 3H), 7.34-7.32 (m, 2H), 7.06 (dd,  $J$ = 4.9, 3.9 Hz, 1H).  $^{13}\text{C}$  NMR (100 MHz, Chloroform-*d*)  $\delta$  (ppm): 132.52, 131.90, 131.35, 129.25, 128.46, 128.41, 127.29, 127.14, 93.07, 82.64.

### 3-(Thiophen-2-yl)prop-2-yn-1-ol [9]:

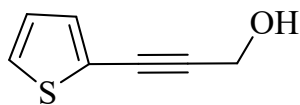

$^1\text{H}$  NMR (400 MHz, Chloroform-*d*)  $\delta$  (ppm): 7.30 (dd,  $J= 5.2, 1.2$  Hz, 1H), 7.25 (dd,  $J= 3.7, 1.2$  Hz, 1H), 7.01 (dd,  $J= 5.2, 3.6$  Hz, 1H), 4.54 (s, 2H), 1.85 (s, 1H).  $^{13}\text{C}$  NMR (100 MHz, Chloroform-*d*)  $\delta$  (ppm): 132.44, 127.50, 127.01, 122.42, 91.13, 79.10, 51.78.

### 3. Copy of Original $^1\text{H}$ NMR and $^{13}\text{C}$ NMR spectra

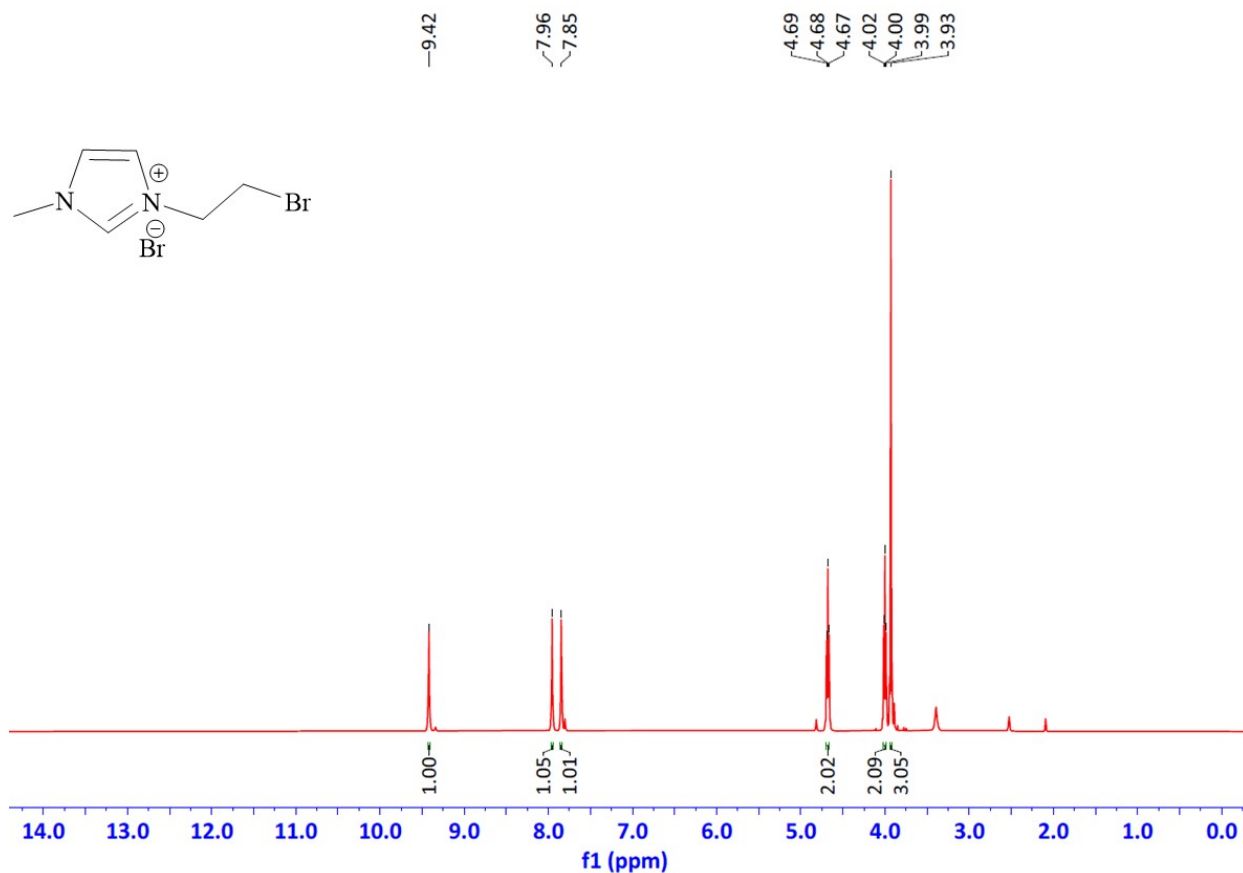

$^1\text{H}$  NMR of 1-(2-bromoethyl)-3-methylimidazolium bromide ionic liquid (IL)

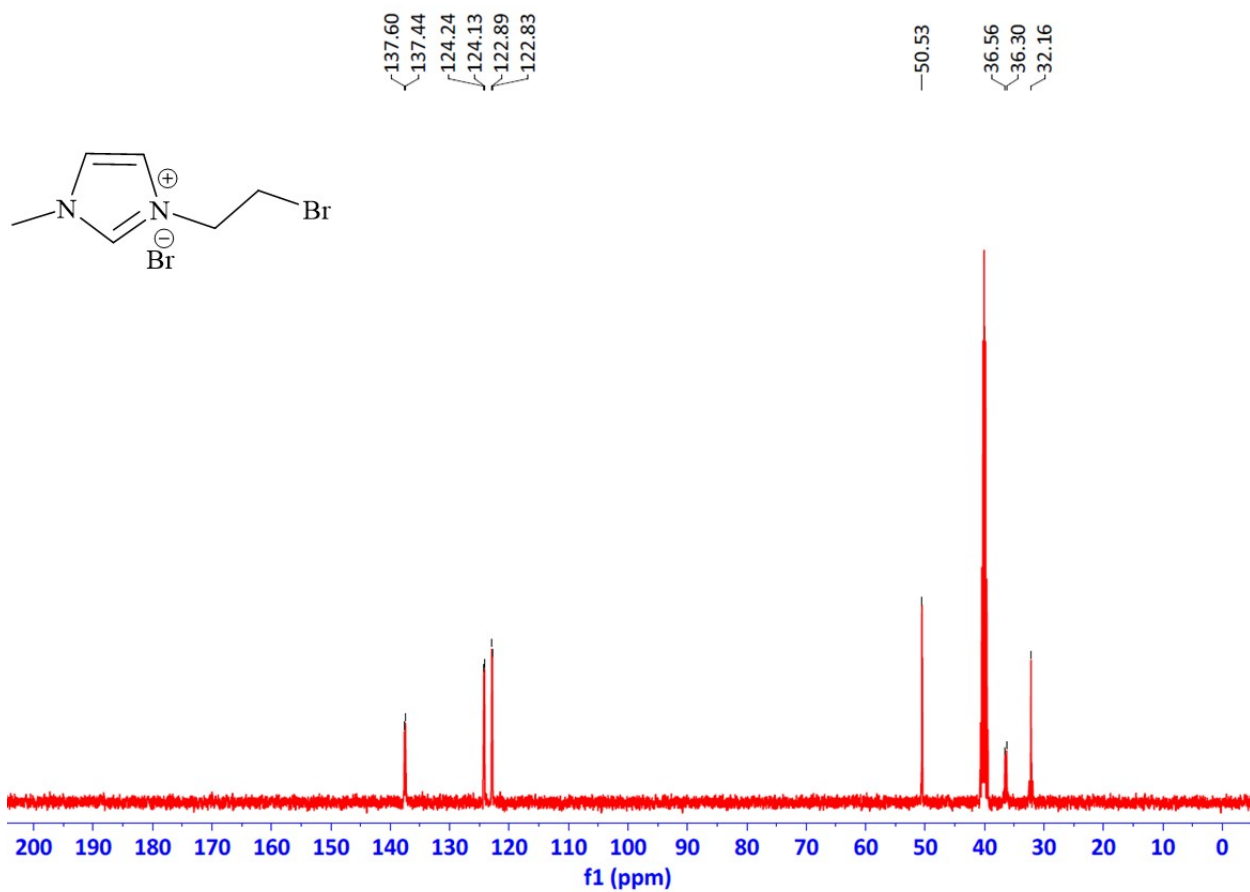

$^{13}\text{C}$  NMR of 1-(2-bromoethyl)-3-methylimidazolium bromide ionic liquid (IL)

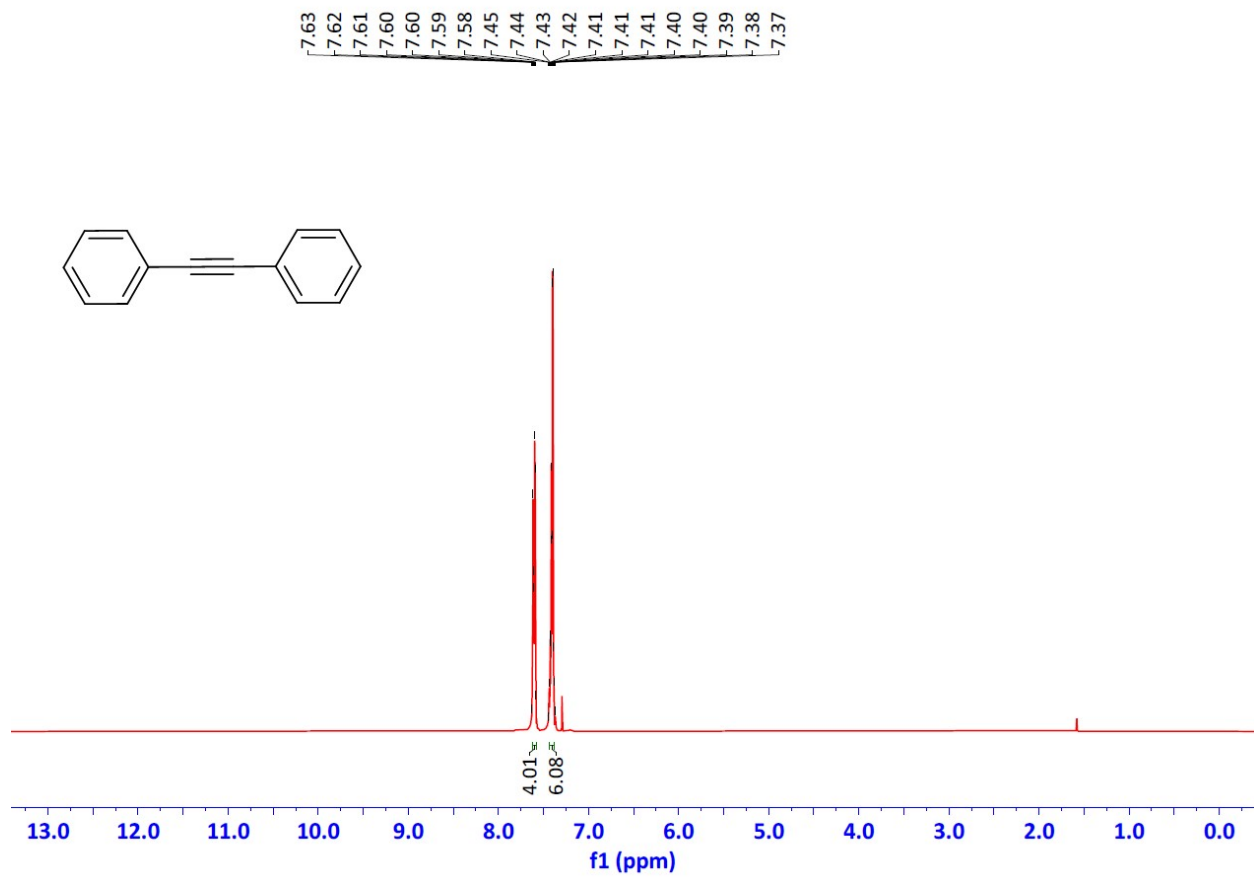

<sup>1</sup>H NMR of 1,2-diphenylethyne

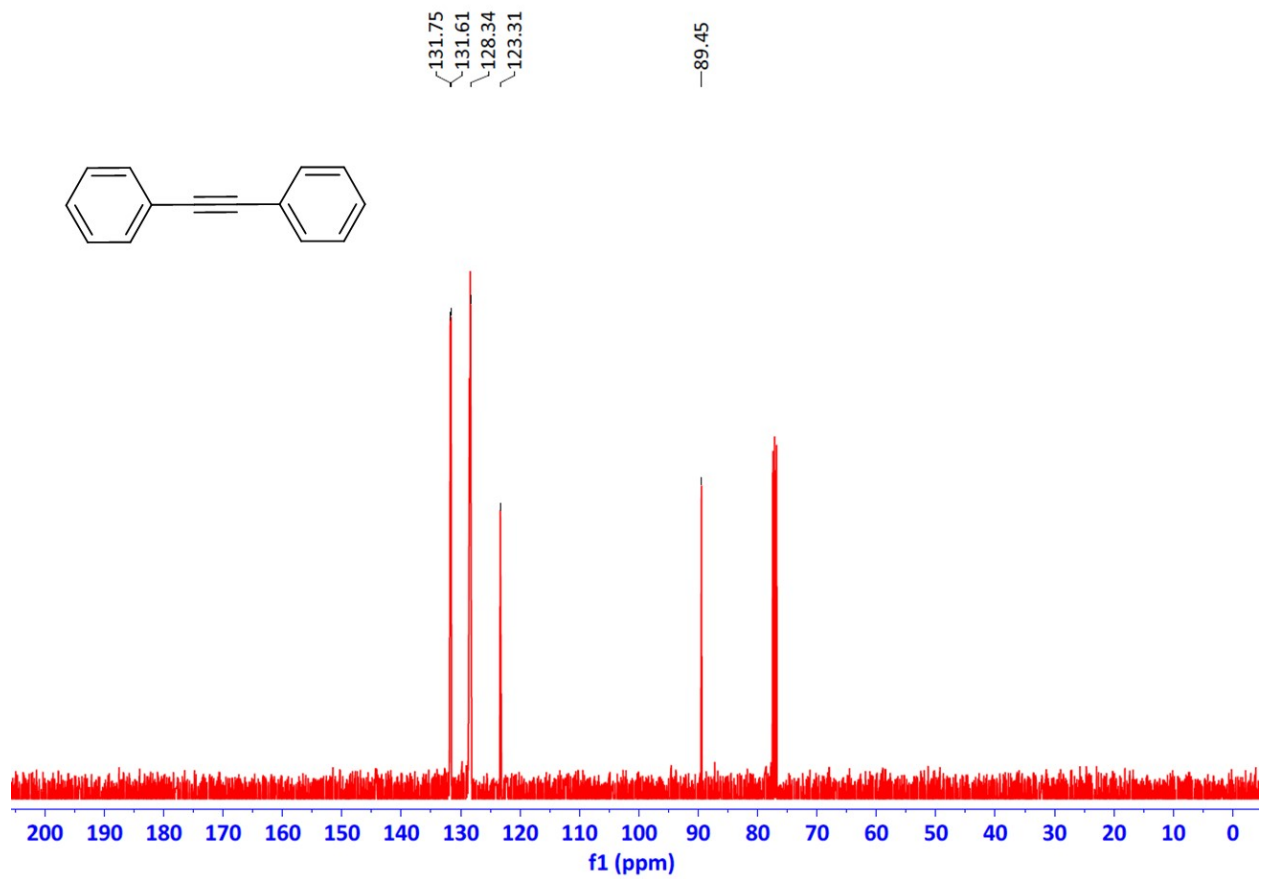

$^{13}\text{C}$  NMR of 1,2-diphenylethyne

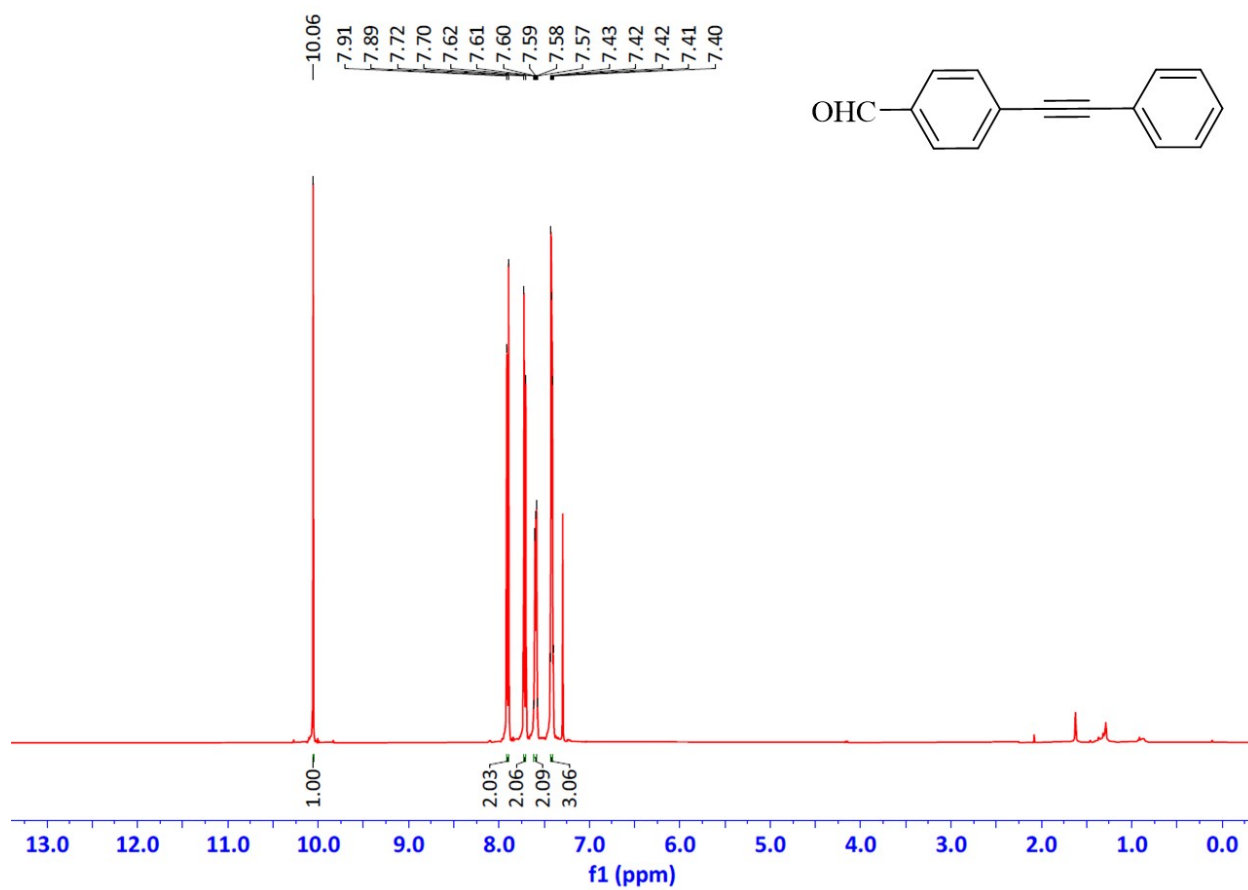

$^1\text{H}$  NMR of 4-(phenylethynyl)benzaldehyde

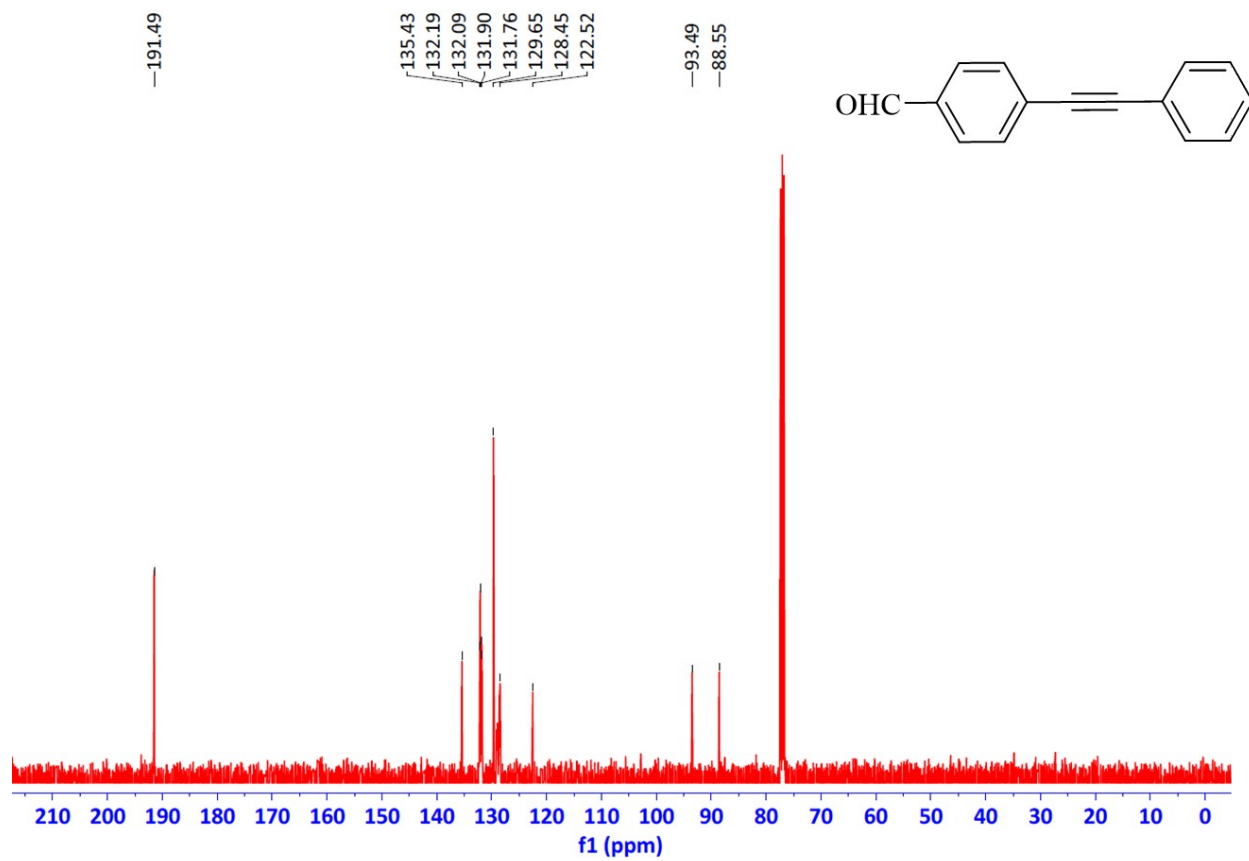

<sup>13</sup>C NMR of 4-(phenylethynyl)benzaldehyde

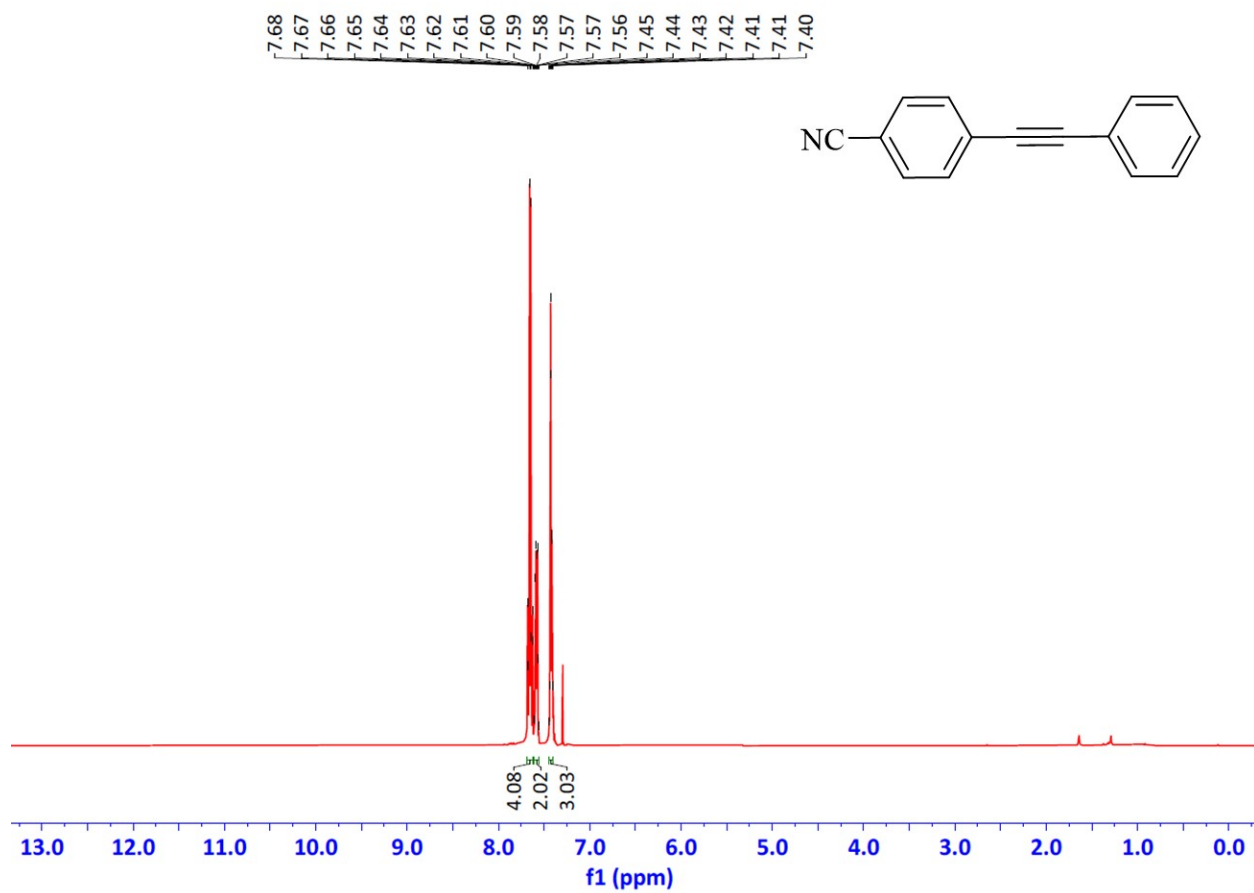

<sup>1</sup>H NMR of 4-(phenylethynyl)benzonitrile



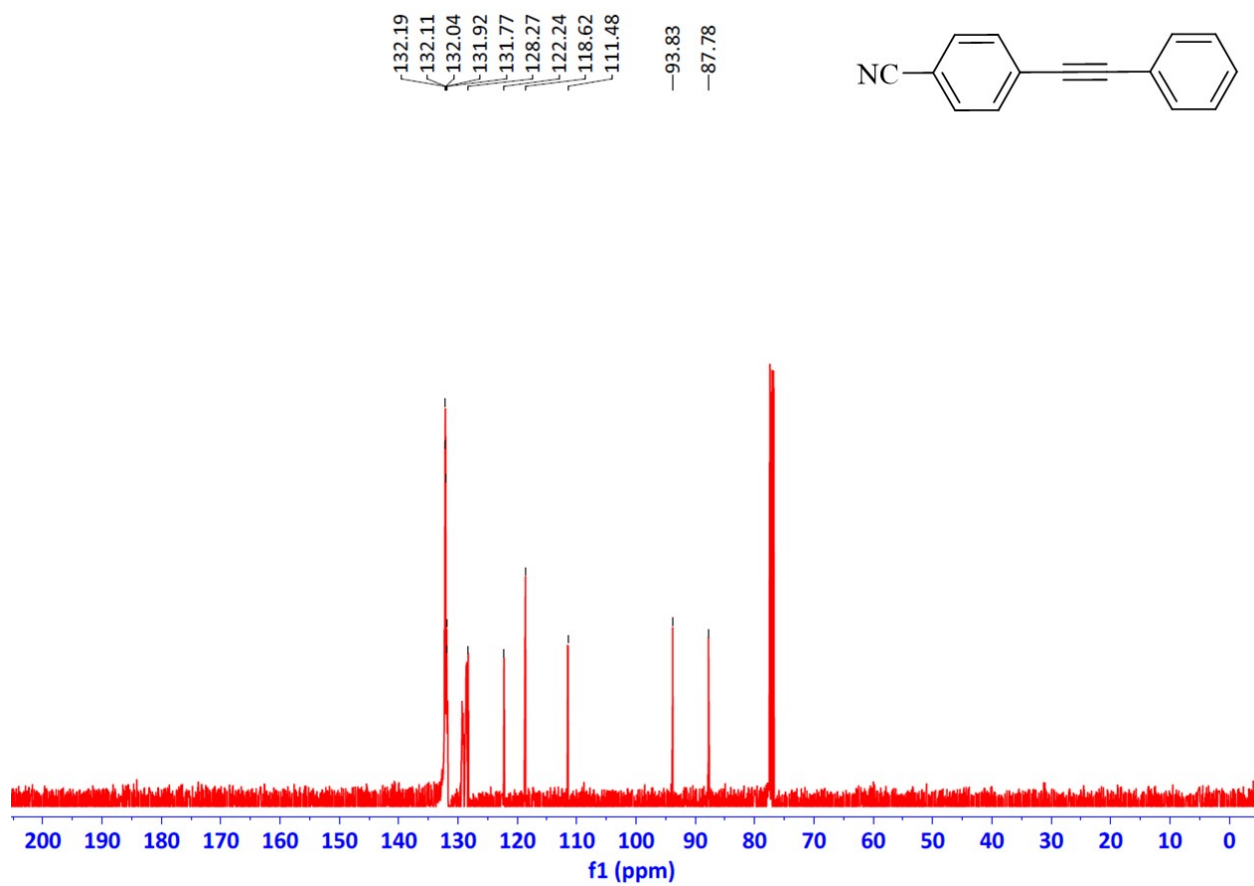

$^{13}\text{C}$  NMR of 4-(phenylethynyl)benzonitrile

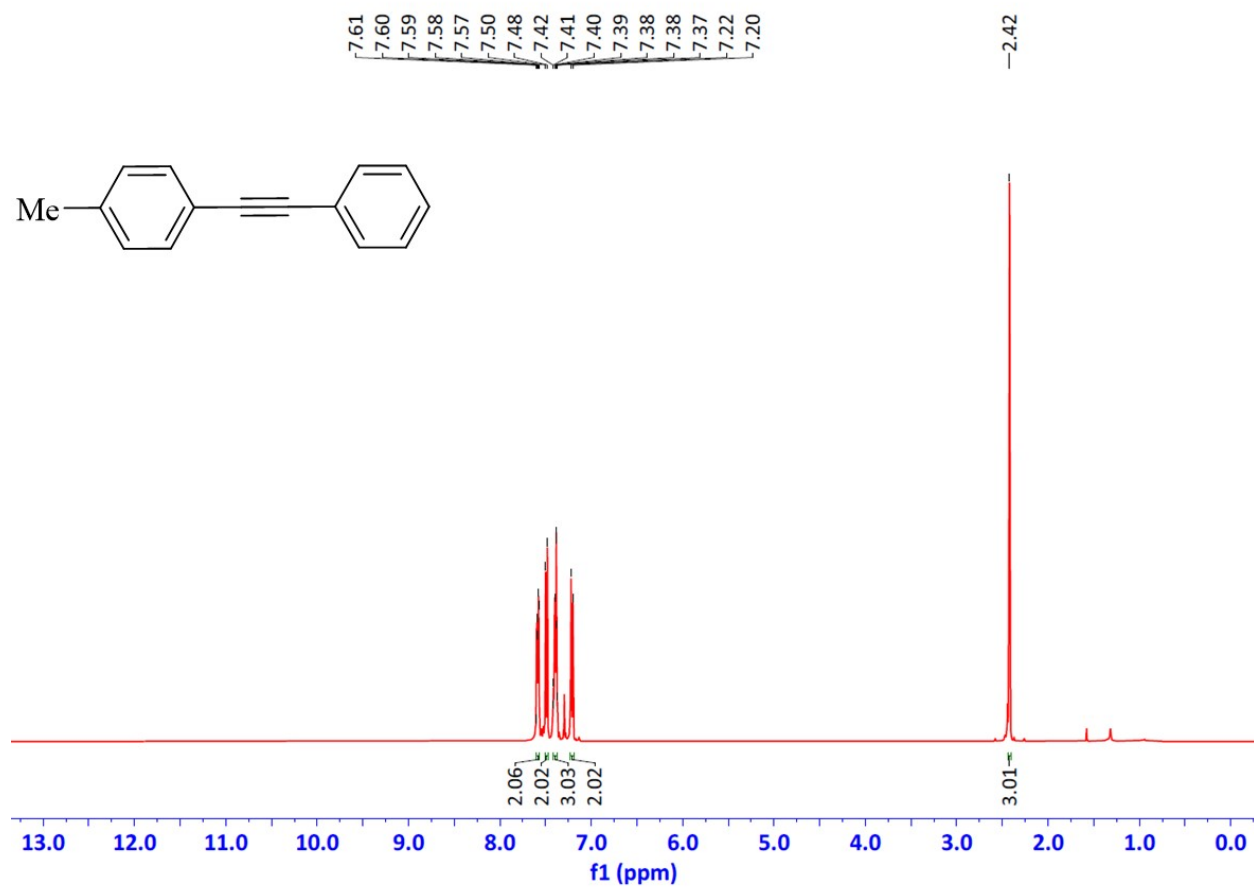

<sup>1</sup>H NMR of 1-methyl-4-(phenylethynyl)benzene

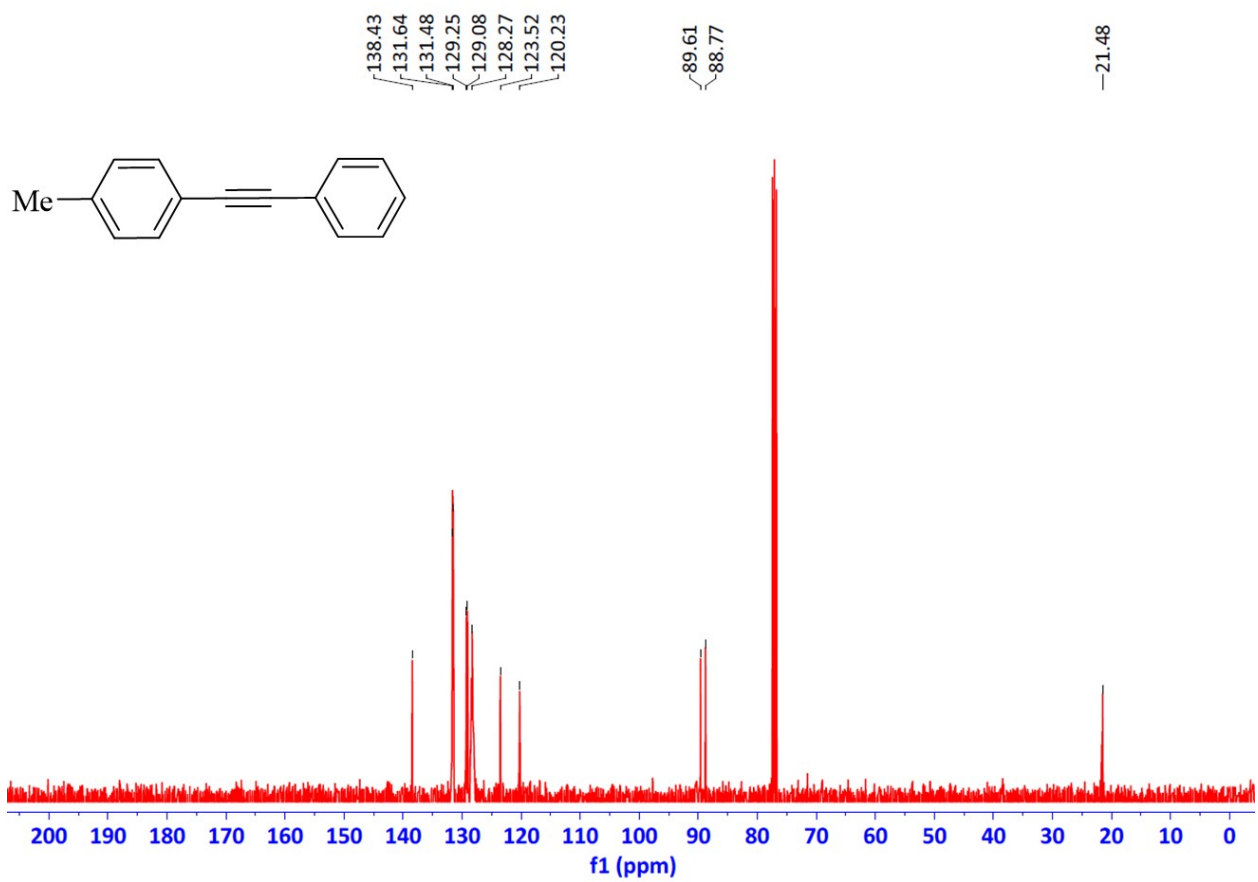

<sup>13</sup>C NMR of 1-methyl-4-(phenylethynyl)benzene

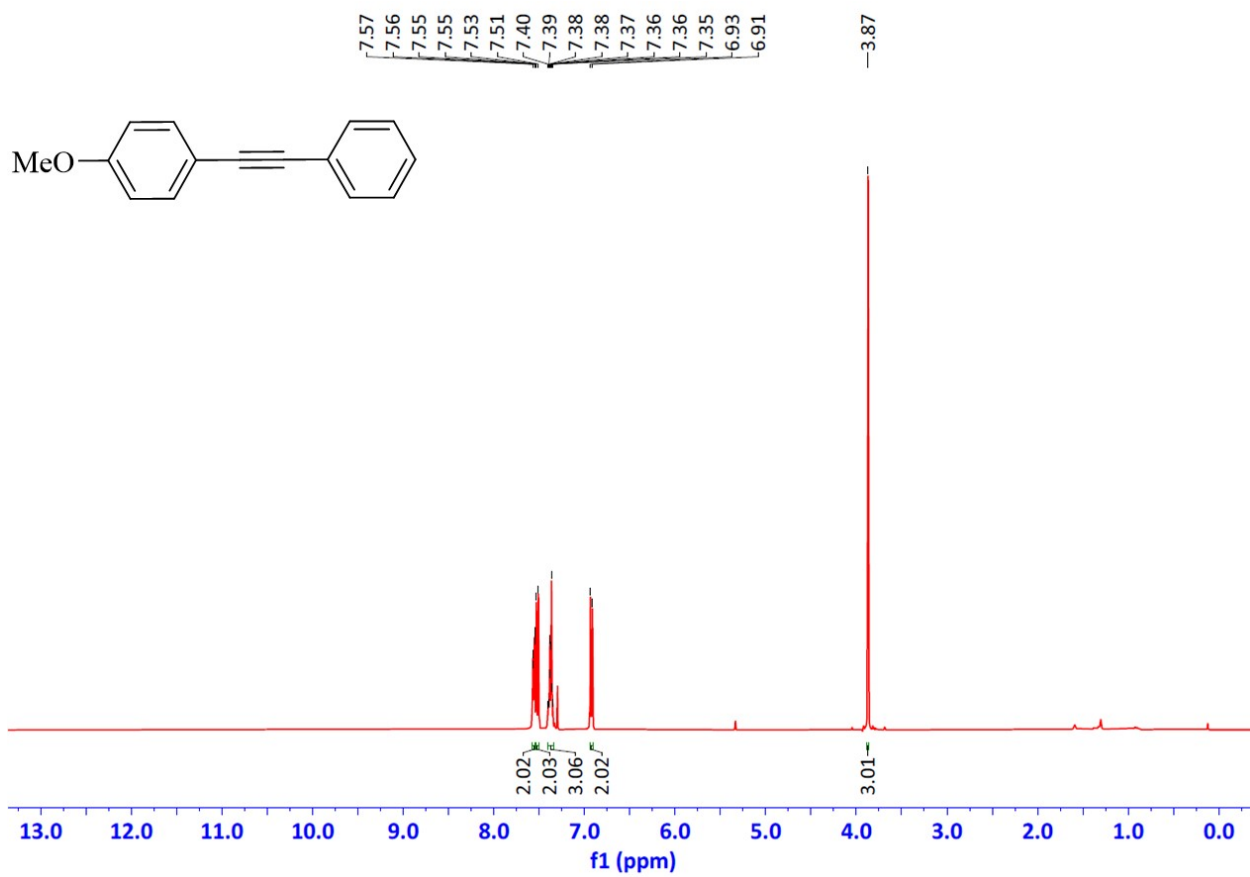

<sup>1</sup>H NMR of 1-methoxy-4-(phenylethynyl)benzene

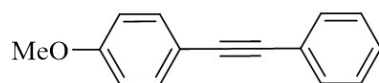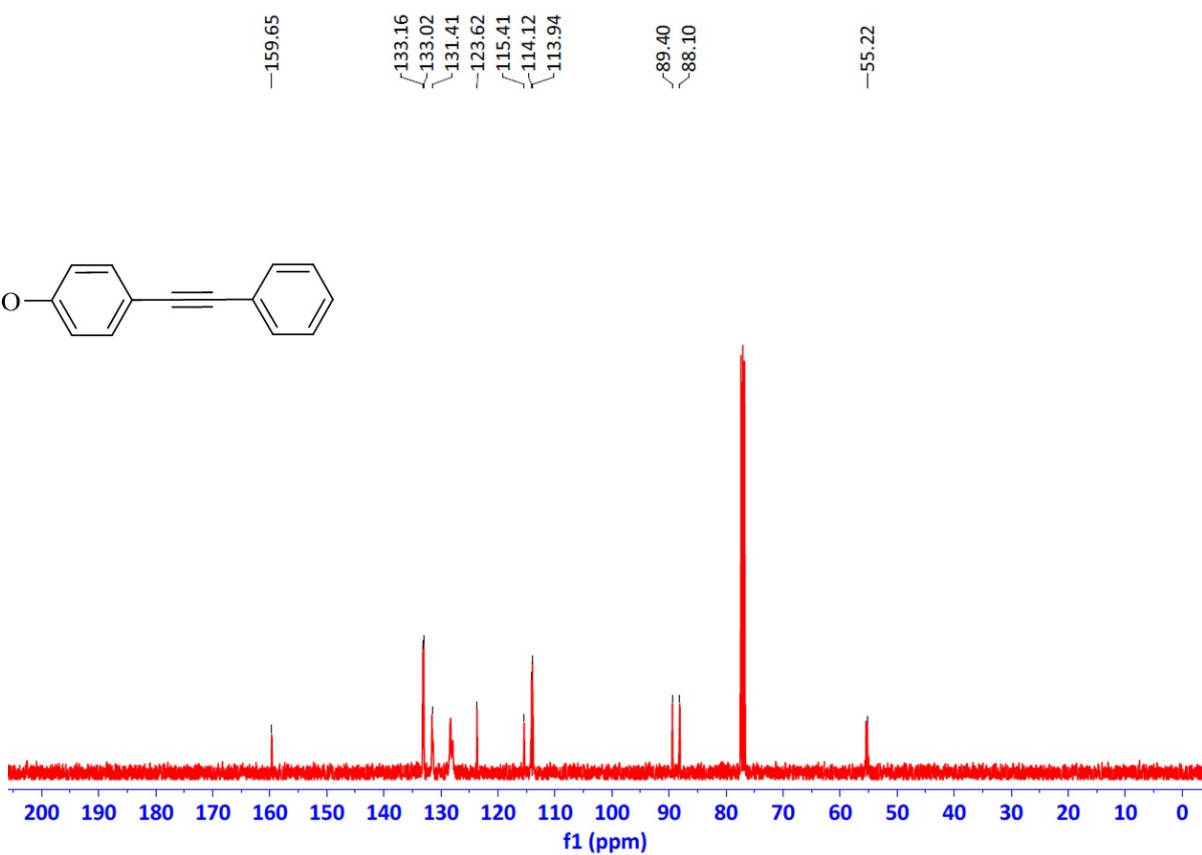

<sup>13</sup>C NMR of 1-methoxy-4-(phenylethynyl)benzene



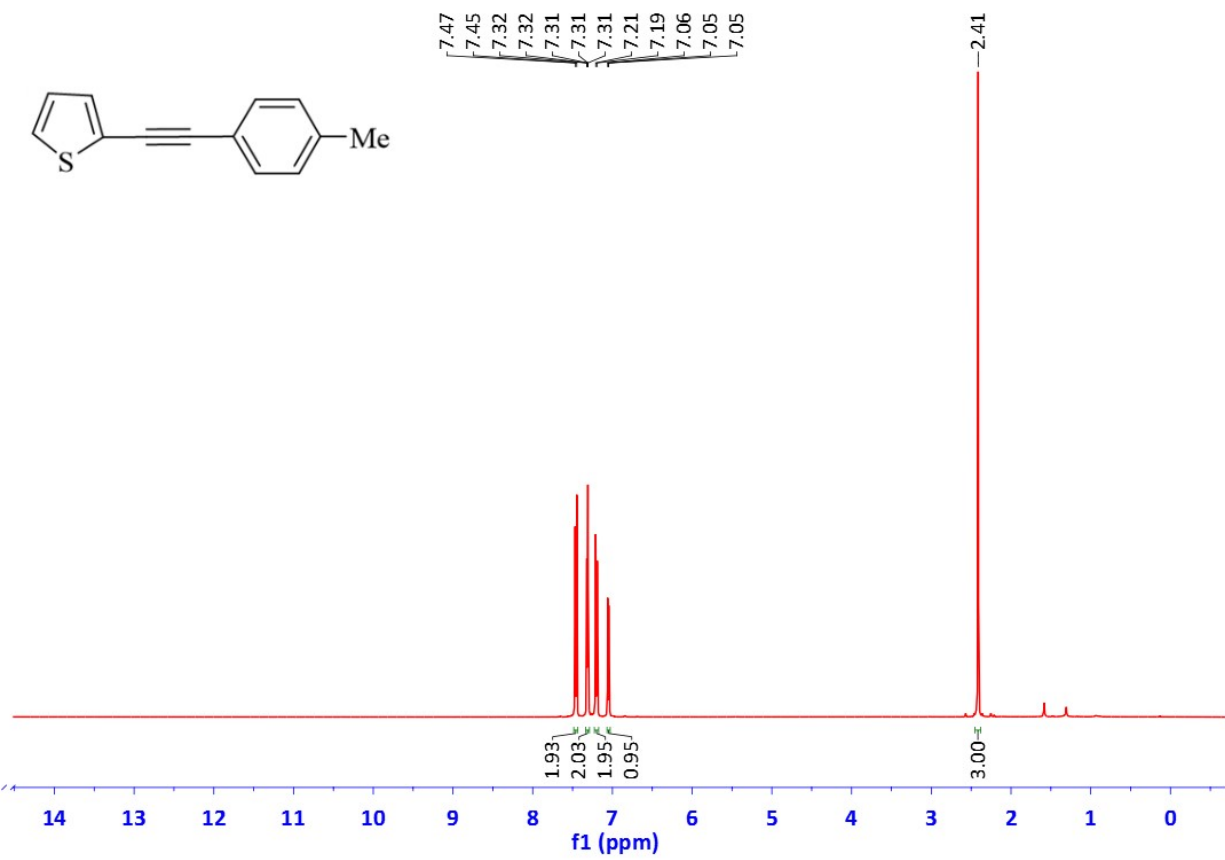

<sup>1</sup>H NMR of 2-(p-tolyethynyl)thiophene

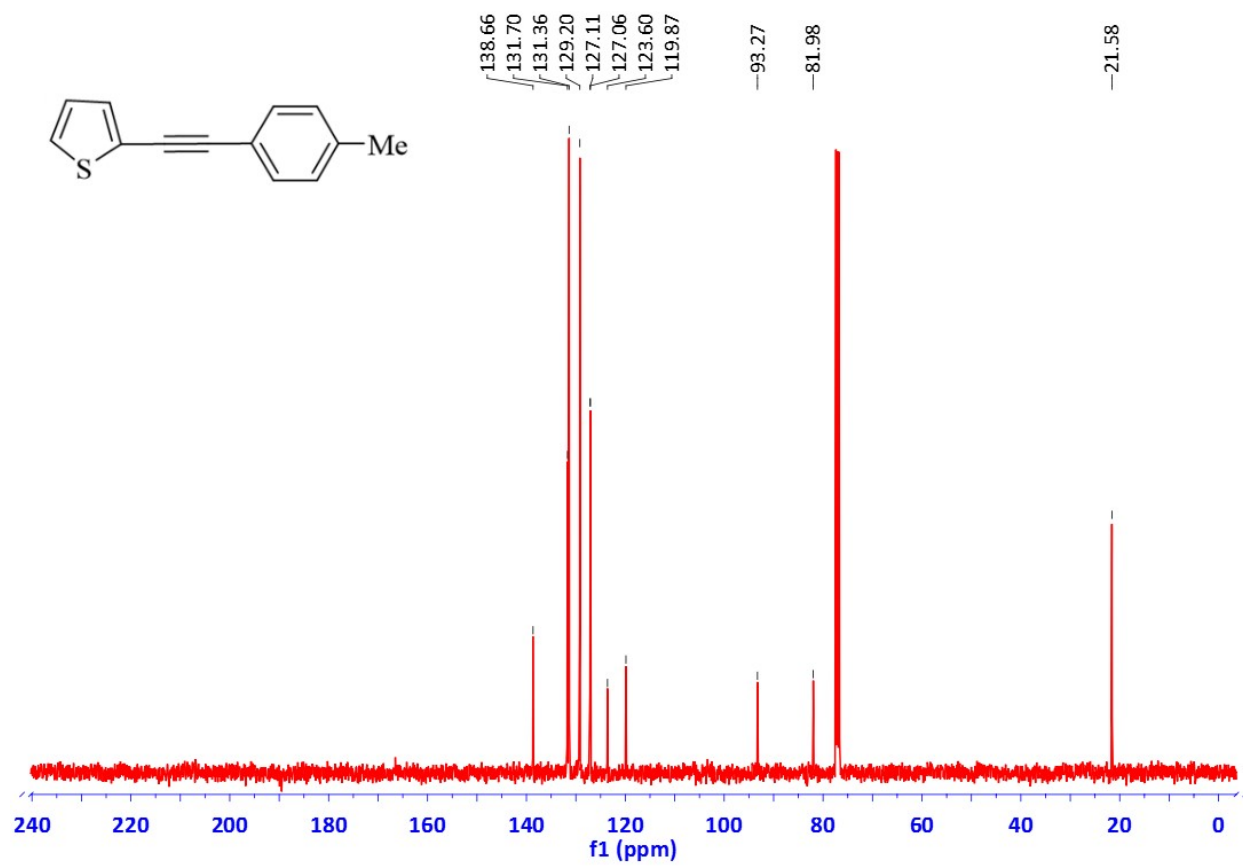

<sup>13</sup>C NMR of 2-(p-tolylethynyl)thiophene



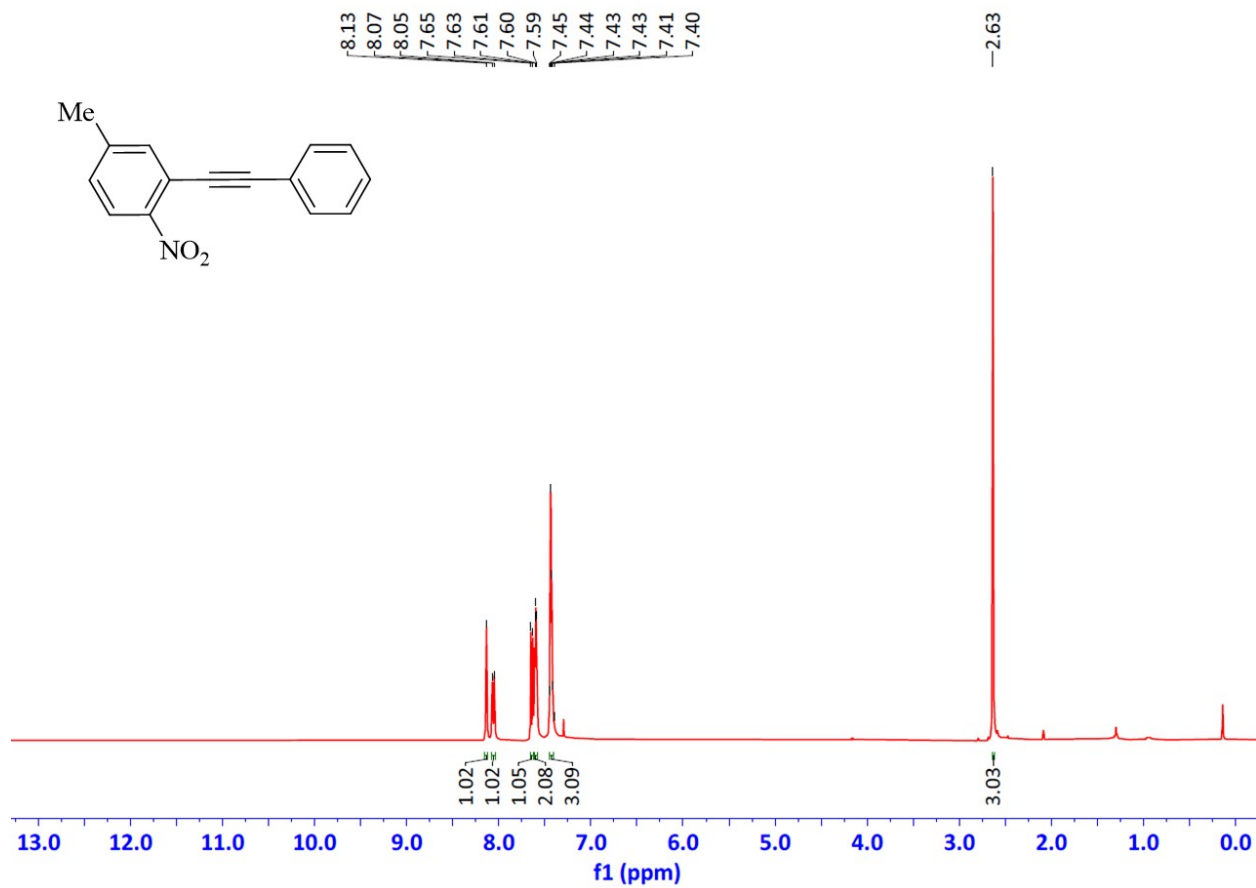

<sup>1</sup>H NMR of 4-methyl-1-nitro-2-(phenylethynyl)benzene

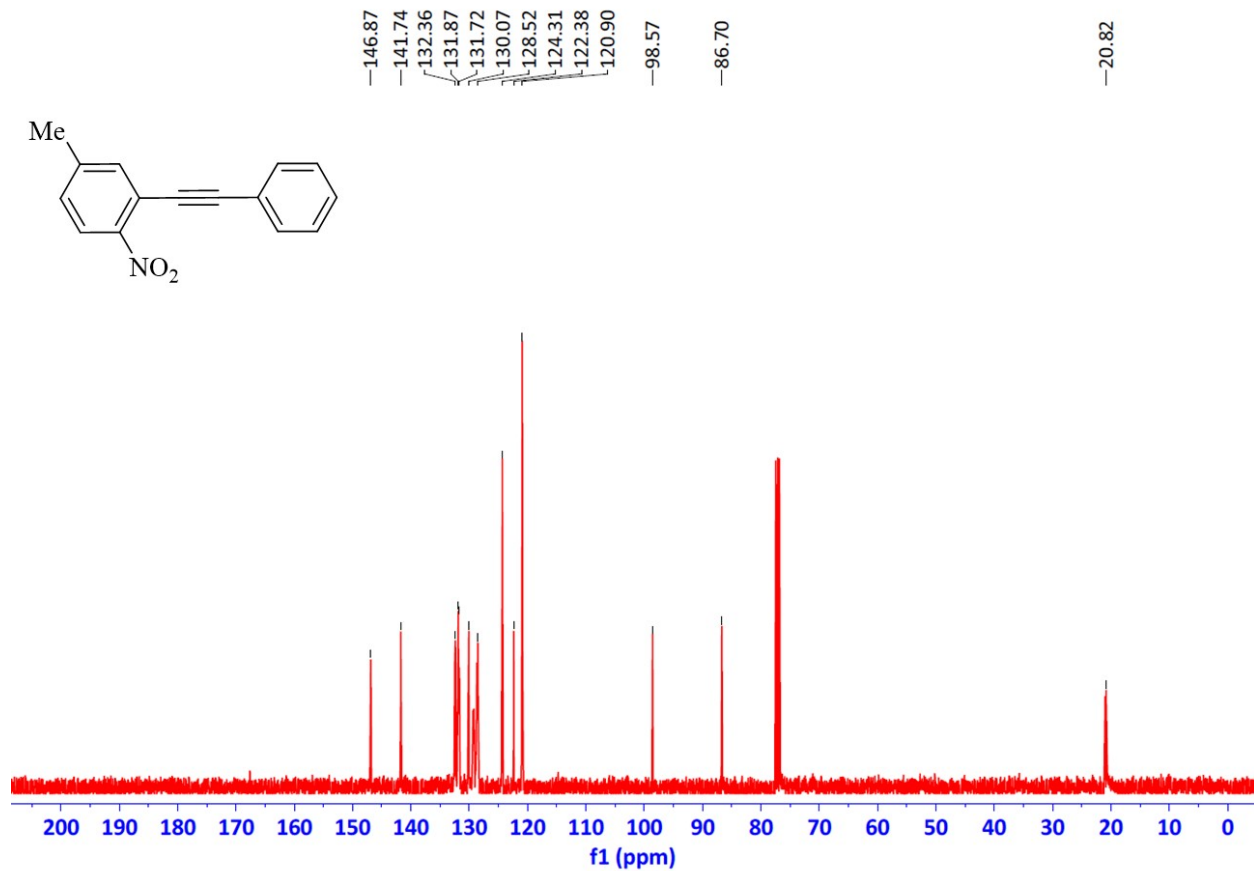

$^{13}\text{C}$  NMR of 4-methyl-1-nitro-2-(phenylethynyl)benzene

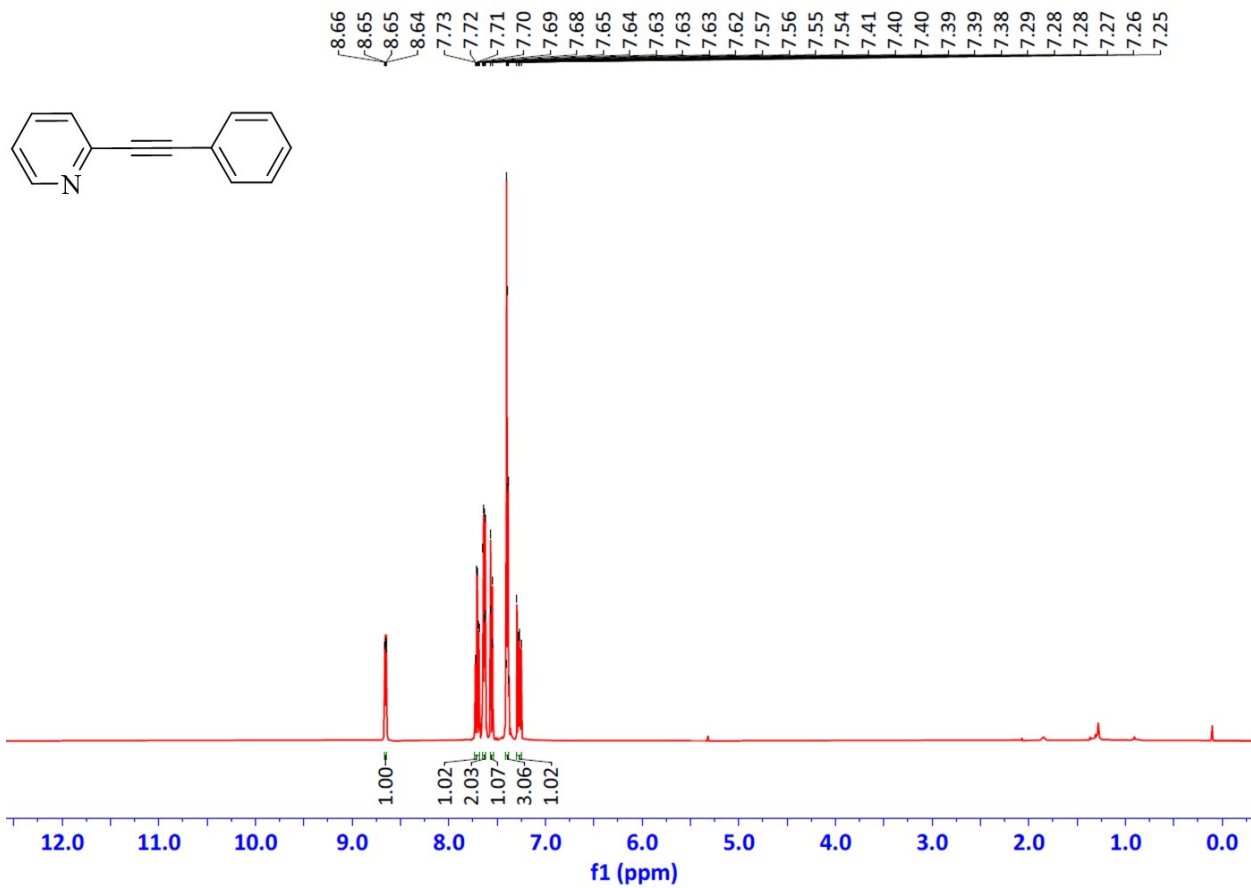

<sup>1</sup>H NMR of 2-(phenylethynyl)pyridine

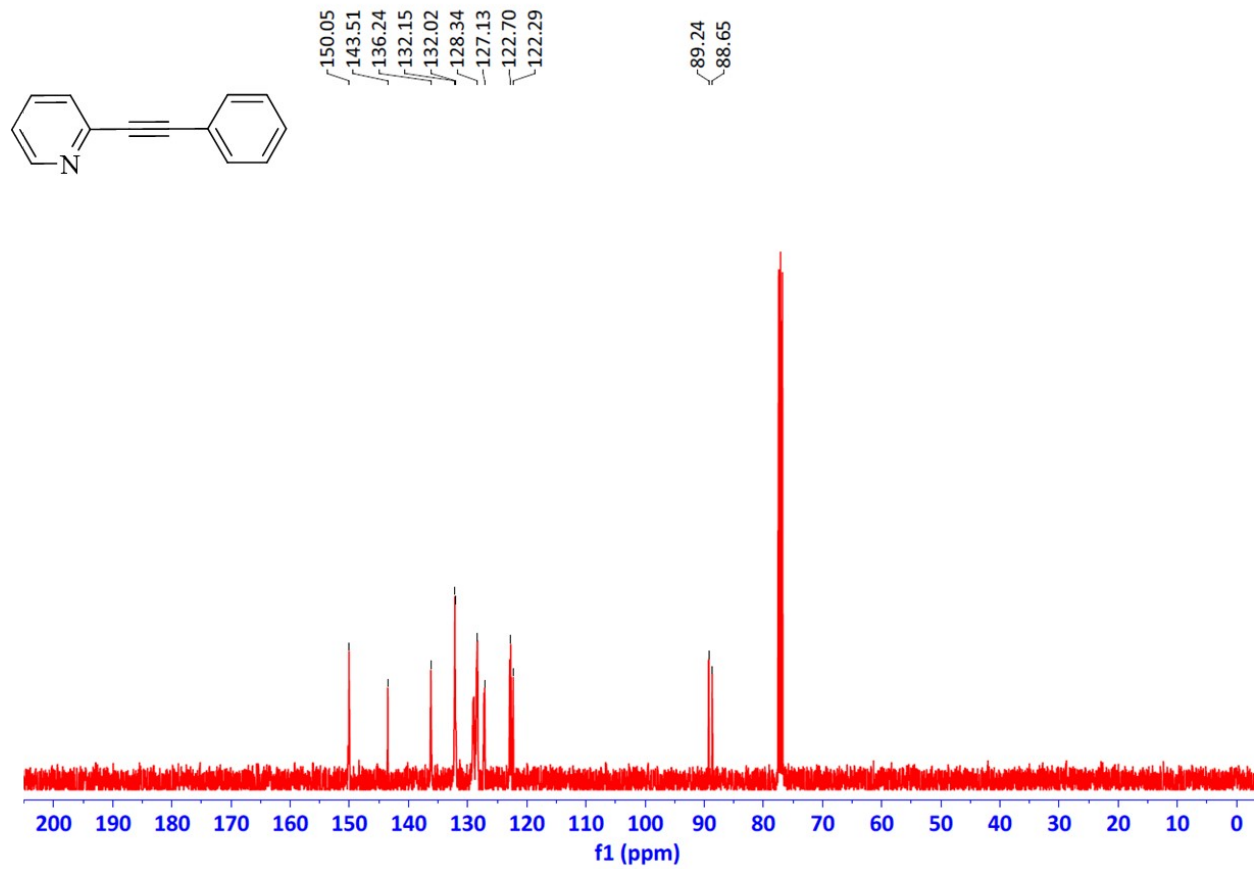

<sup>13</sup>C NMR of 2-(phenylethynyl)pyridine

#### 4. References

- [1] M. Gholinejad, M. Bahrami, C. Nájera, B. Pullithadathil, *J. Catal.* 363 (2018) 81–91.
- [2] B. A. Martek, M. Gazvoda, D. Urankar, J. Kosmrlj, *Org. Lett.* 22 (2020) 4938–4943.
- [3] Y. B. Platonova, A. N. Volov, L. G. Tomilova, *J. Catal.* 391 (2020) 224–228.
- [4] A. Kiani, H. Alinezhad, S. Ghasemi, *J. Organomet. Chem.* 950 (2021) 121975.
- [5] Y. Yang, Y. H. Lim, E.G. Robins, C.W. Johannes, *RSC Adv.* 6 (2016) 72810–72814.
- [6] Y. Yu, X. Chen, Q. Wu, D. Liu, L. Hu, L. Yu, G. Zhu, *J. org. chem.* 83 (2018) 8556-8566.
- [7] M. Gholinejad, N. Dasvarz, C. Nájera, *Inorganica Chim. Acta.* 483 (2018) 262–270.
- [8] F. Messa, G. Dilauro, F. M. Perna, P. Vitale, V. Capriati, A. Salomone, *ChemCatChem.* 12 (2020) 1–7.
- [9] F. Khosravi, M. Gholinejad, J. M. Sansano, R. Luque, *Molecular Catalysis.* 522 (2022) 112199.
