# Supplementary material for: Gold and palladium supported on an ionic liquid modified Fe-based metal–organic framework (MOF) as highly efficient catalysts for the reduction of nitrophenols, dyes and Sonogashira–Hagihara reactions
Source: Royal Society of Chemistry journal article supplement (doi:10.1039/d3ra00283g), 2023-01-01
Supplement: d3ra00283g2.pdf [file d3ra00283g2.pdf]

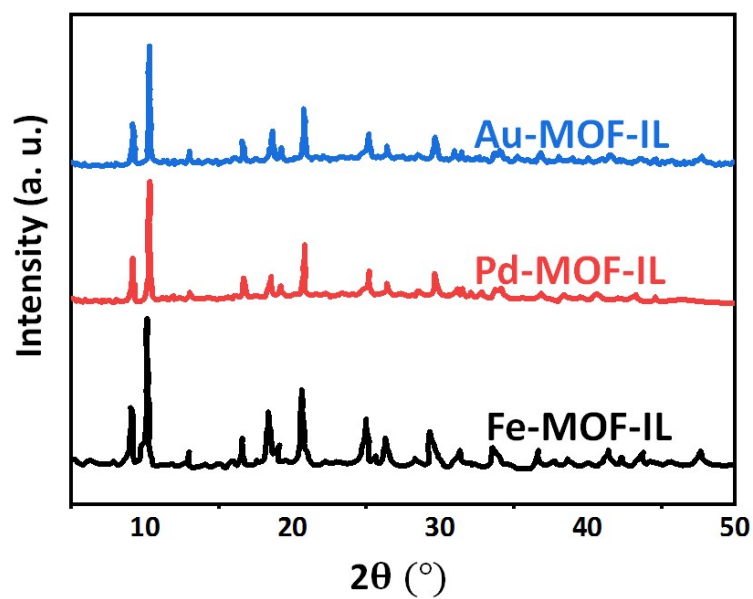

**Figure S 1.** XRD pattern dates of Fe-MOF-IL, Au@Fe-MOF-IL and Pd@Fe-MOF-IL.

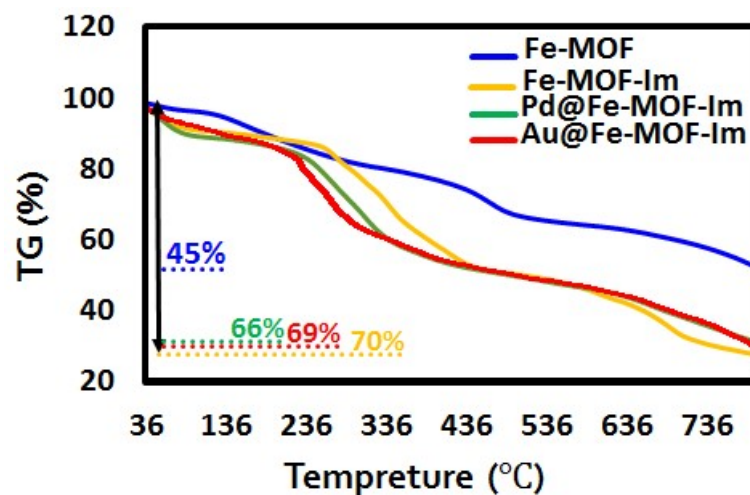

**Figure S 2.** TGA analysis of Fe-MOF, Fe-MOF-IL, Au@Fe-MOF-IL, and Pd@Fe-MOF-IL.
